# Supplementary material for: Ethnic Differences in the Safety and Efficacy of Tenecteplase Versus Alteplase for Acute Ischemic Stroke: A Systematic Review and Meta-Analysis
Source: PubMed Central journal article supplement — J Stroke. 2024 Sep 13;26(3):371–90. doi: 10.5853/jos.2024.01284 (PMC11471352; doi:10.5853/jos.2024.01284), 2024-09-13
Supplement: jos-2024-01284-Supplementary-Fig-1,2.pdf [file jos-2024-01284-Supplementary-Fig-1%2C2.pdf]

| Study                                            | Risk of bias domains |    |    |    |    |    |    | Overall |
|--------------------------------------------------|----------------------|----|----|----|----|----|----|---------|
|                                                  | D1                   | D2 | D3 | D4 | D5 | D6 | D7 |         |
| Chandra et al. Arch Med Health Sci. 2023.        | -                    | +  | +  | +  | +  | -  | +  | -       |
| Checkouri et al. Eur Stroke J. 2023.             | -                    | +  | +  | -  | +  | +  | +  | -       |
| Dhar et al. Ann Indian Acad Neurol. 2022.        | -                    | ✗  | +  | +  | -  | +  | +  | ✗       |
| Estella et al. J Pers Med. 2022.                 | +                    | -  | +  | +  | +  | -  | +  | -       |
| George et al. J Clin Neurosci. 2021.             | -                    | ✗  | +  | +  | -  | +  | +  | ✗       |
| Gerschenfeld et al. Eur Stroke J. 2022.          | +                    | -  | +  | +  | +  | -  | +  | -       |
| Hall et al. Stroke. 2021.                        | +                    | +  | +  | +  | +  | +  | +  | +       |
| Hendrix et al. J Neurointerv Surg. 2022.         | +                    | +  | +  | +  | +  | +  | +  | +       |
| Kuruttukulam et al. J Stroke Med. 2023.          | +                    | +  | +  | +  | +  | +  | +  | +       |
| Li et al. Stroke Vasc Neurol. 2022.              | +                    | +  | +  | +  | +  | +  | +  | +       |
| Mahawish et al. Stroke. 2021.                    | +                    | +  | +  | +  | +  | +  | +  | +       |
| Mohan et al. Ann Indian Acad Neurol. 2023.       | ✗                    | -  | +  | +  | -  | +  | +  | ✗       |
| Murphy et al. Ann Emerg Med. 2023.               | +                    | +  | +  | -  | +  | -  | +  | -       |
| Parsons et al. Neurology. 2009.                  | +                    | +  | +  | +  | +  | +  | +  | +       |
| Psychogios et al. Thera Adv Neurol Disord. 2021. | +                    | -  | -  | +  | +  | -  | +  | -       |
| Qureshi et al. J Stroke Cerebrovasc Dis. 2023.   | -                    | ✗  | +  | +  | -  | +  | +  | ✗       |
| Sjogren et al. IBRO Neurosci Rep. 2023.          | ✗                    | -  | +  | -  | -  | +  | +  | ✗       |
| Sundar et al. Neurol Asia. 2019.                 | -                    | ✗  | +  | -  | +  | +  | +  | ✗       |
| Teivane et al. Medicina (Kaunas). 2022.          | +                    | -  | +  | -  | +  | +  | +  | -       |
| Tsivgoulis et al. Ann Neurol. 2022.              | +                    | +  | +  | +  | +  | +  | +  | +       |
| Walton et al. Ann Pharmacother. 2023.            | +                    | -  | +  | -  | +  | -  | +  | -       |
| Warach et al. JAMA Neurol. 2023.                 | +                    | +  | +  | +  | +  | +  | +  | +       |
| Warach et al. Stroke. 2022.                      | +                    | +  | +  | +  | +  | +  | +  | +       |
| Zhao et al. Front Neurol. 2023.                  | +                    | +  | +  | +  | +  | +  | +  | +       |
| Zhong et al. Stroke. 2021.                       | +                    | +  | +  | +  | +  | +  | +  | +       |

Domains:  
D1: Bias due to confounding.  
D2: Bias due to selection of participants.  
D3: Bias in classification of interventions.  
D4: Bias due to deviations from intended interventions.  
D5: Bias due to missing data.  
D6: Bias in measurement of outcomes.  
D7: Bias in selection of the reported result.

Judgement  
✗ Serious  
- Moderate  
+ Low

Supplementary Figure 1. Quality assessment of included articles (RoB 2).

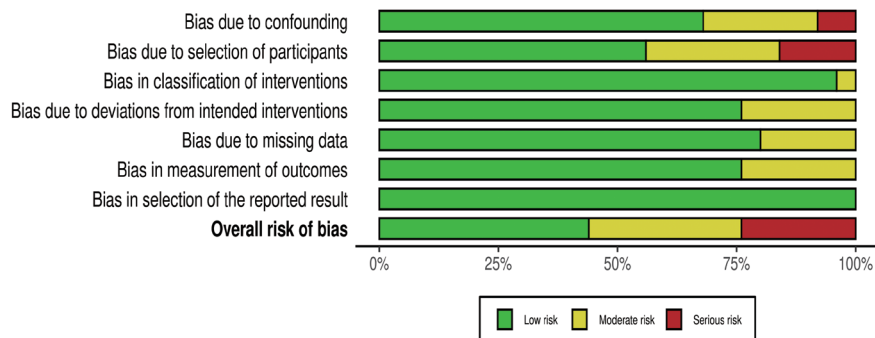

Supplementary Figure 2. Quality assessment of included articles (ROBINS-I).
