# Supplementary material for: Ethnic Differences in the Safety and Efficacy of Tenecteplase Versus Alteplase for Acute Ischemic Stroke: A Systematic Review and Meta-Analysis
Source: PubMed Central journal article supplement — J Stroke. 2024 Sep 13;26(3):371–90. doi: 10.5853/jos.2024.01284 (PMC11471352; doi:10.5853/jos.2024.01284), 2024-09-13
Supplement: jos-2024-01284-Supplementary-Fig-3.pdf [file jos-2024-01284-Supplementary-Fig-3.pdf]

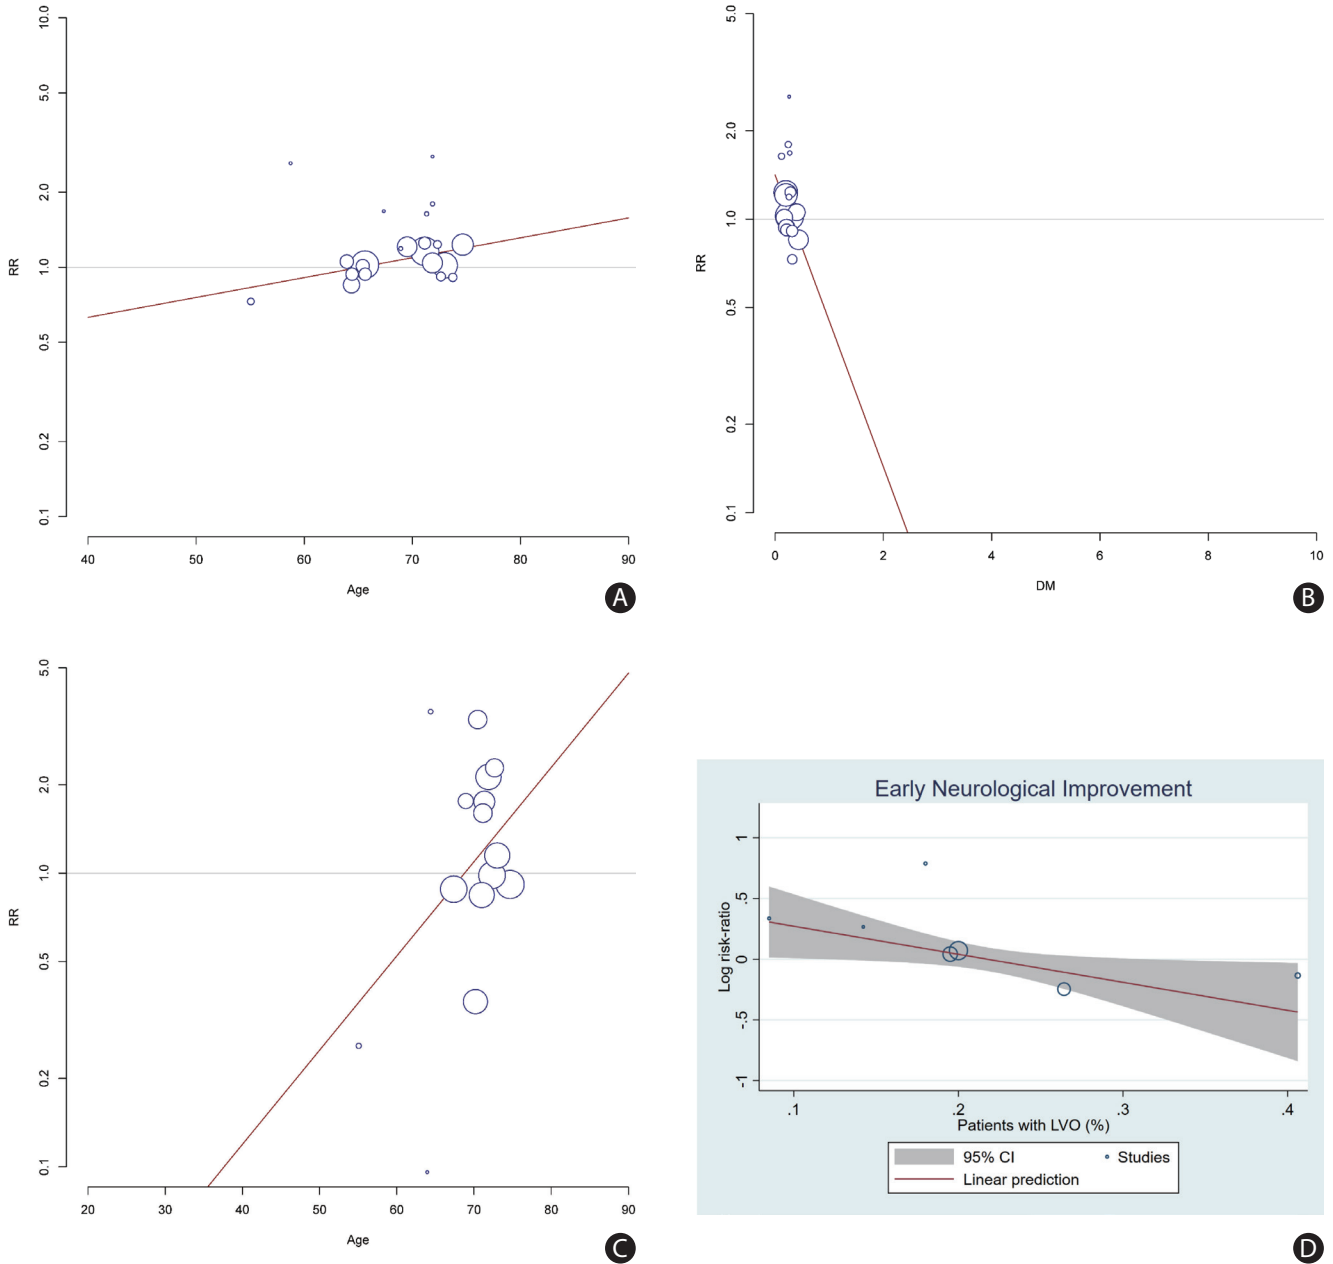

**Supplementary Figure 3.** Bubble plots. (A) Association of mRS 0 to 2 with age. (B) Association of mRS 0 to 2 with diabetes status. (C) Association of complete recanalization with age. (D) Association of early neurological improvement with LVO. mRS, modified Rankin Scale; LVO, large vessel occlusion; RR, risk ratio; CI, confidence interval.
