# Supplementary material for: Ethnic Differences in the Safety and Efficacy of Tenecteplase Versus Alteplase for Acute Ischemic Stroke: A Systematic Review and Meta-Analysis
Source: PubMed Central journal article supplement — J Stroke. 2024 Sep 13;26(3):371–90. doi: 10.5853/jos.2024.01284 (PMC11471352; doi:10.5853/jos.2024.01284), 2024-09-13
Supplement: jos-2024-01284-Supplementary-Fig-4.pdf [file jos-2024-01284-Supplementary-Fig-4.pdf]

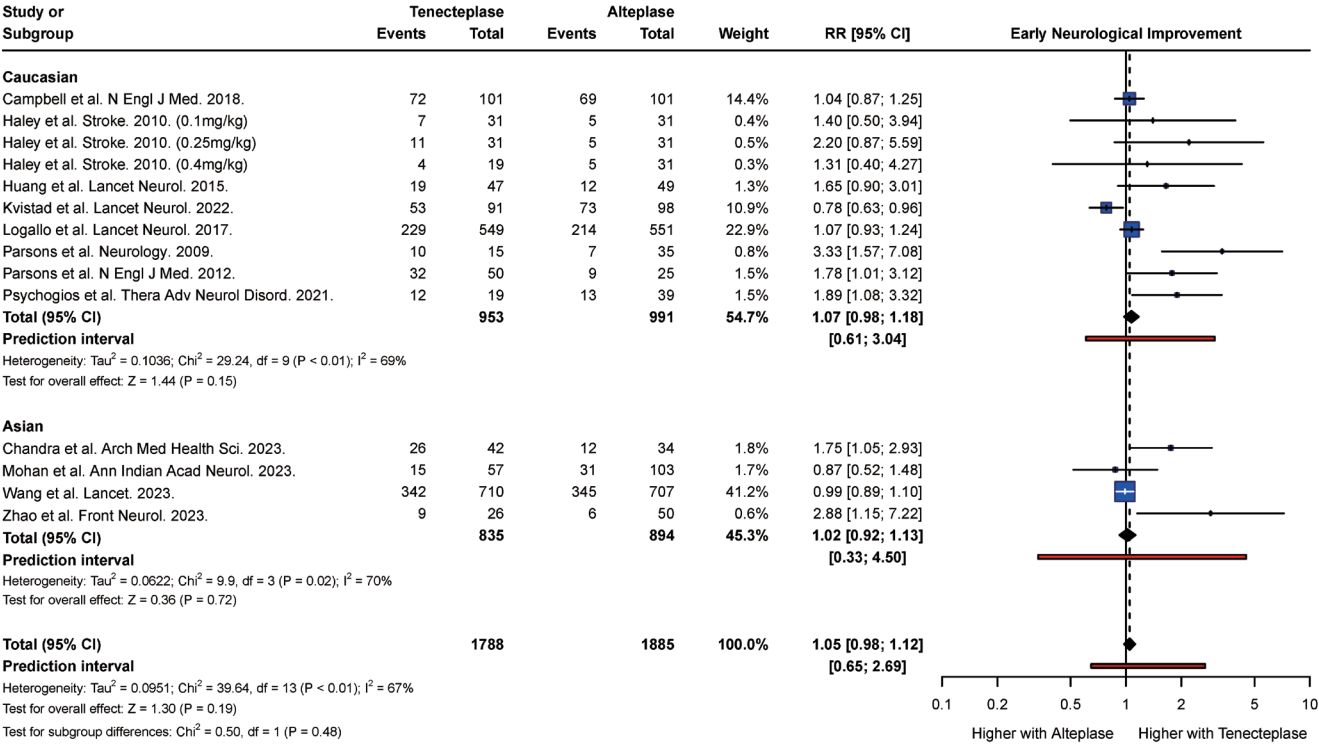

Supplementary Figure 4. Forest plot for early neurological improvement. RR, risk ratio; CI, confidence interval.
