# Supplementary material for: Ethnic Differences in the Safety and Efficacy of Tenecteplase Versus Alteplase for Acute Ischemic Stroke: A Systematic Review and Meta-Analysis
Source: PubMed Central journal article supplement — J Stroke. 2024 Sep 13;26(3):371–90. doi: 10.5853/jos.2024.01284 (PMC11471352; doi:10.5853/jos.2024.01284), 2024-09-13
Supplement: jos-2024-01284-Supplementary-Fig-8.pdf [file jos-2024-01284-Supplementary-Fig-8.pdf]

Cumulative meta-analysis

mRS 0 to 2

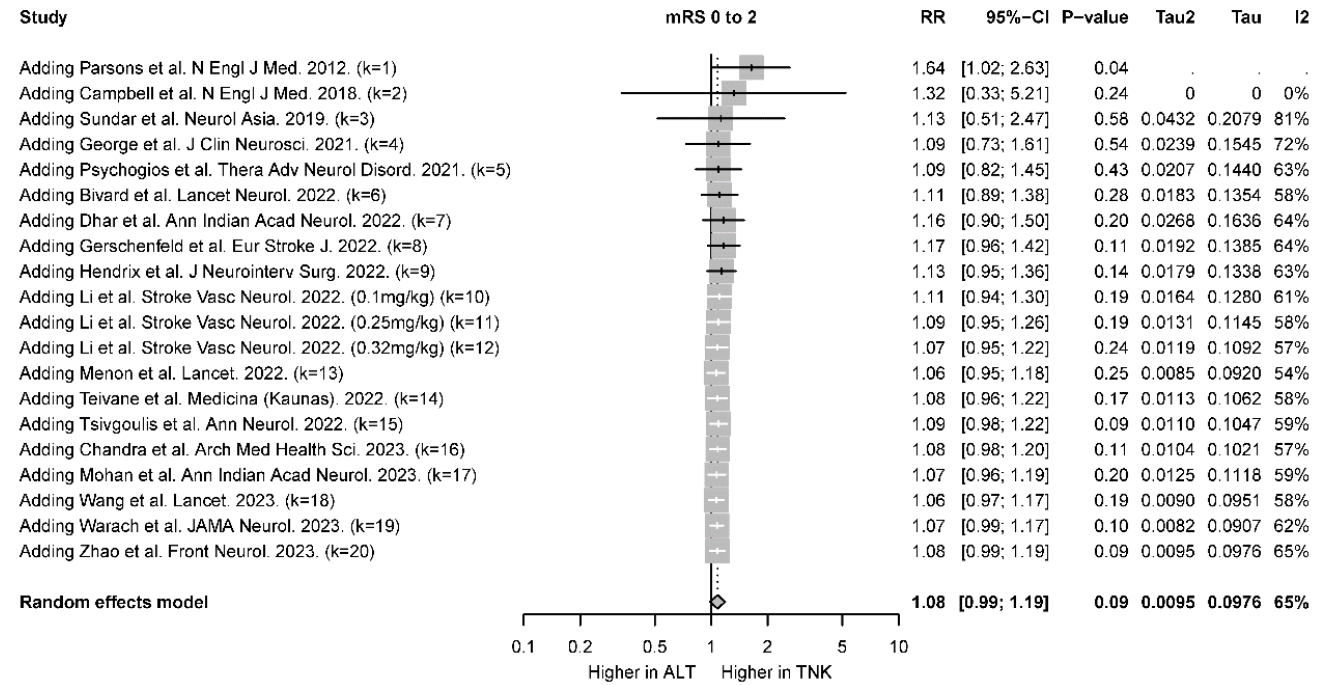

mRS 0 to 1

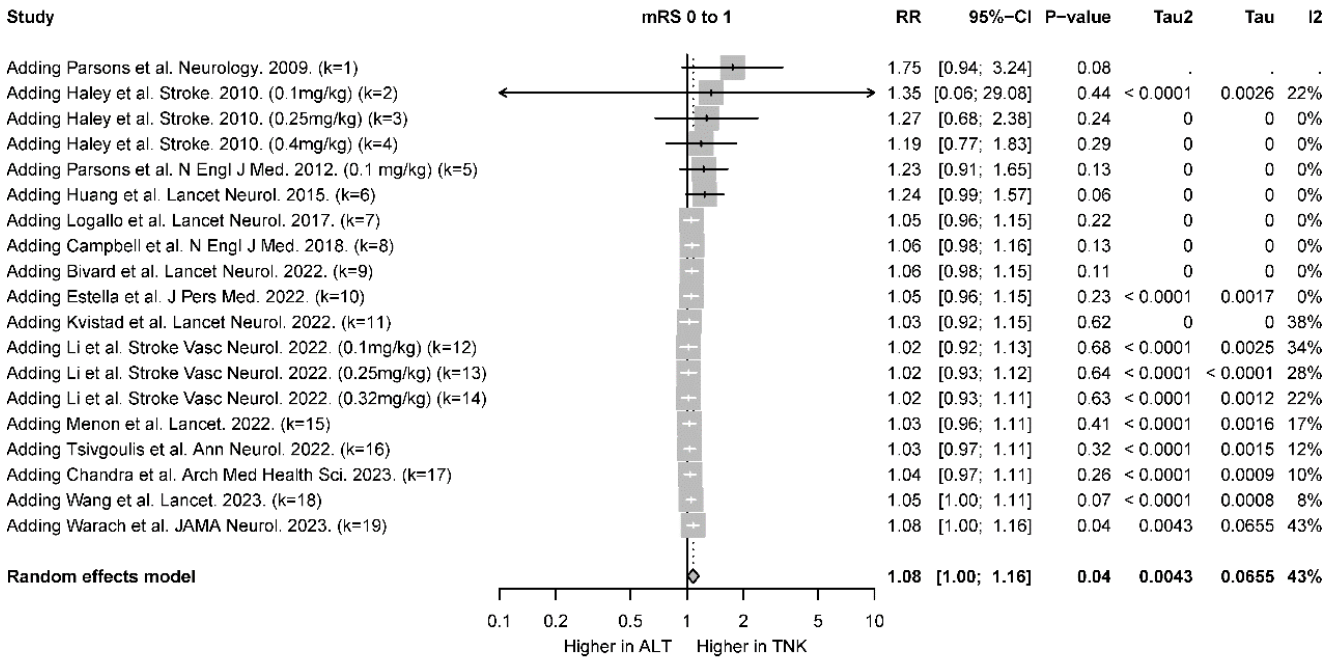

**Supplementary Figure 8.** Cumulative meta-analyses and leave-one-out influence analyses. mRS, modified Rankin Scale; RR, risk ratio; CI, confidence interval; TNK, tenecteplase; ALT, alteplase.

Complete recanalization

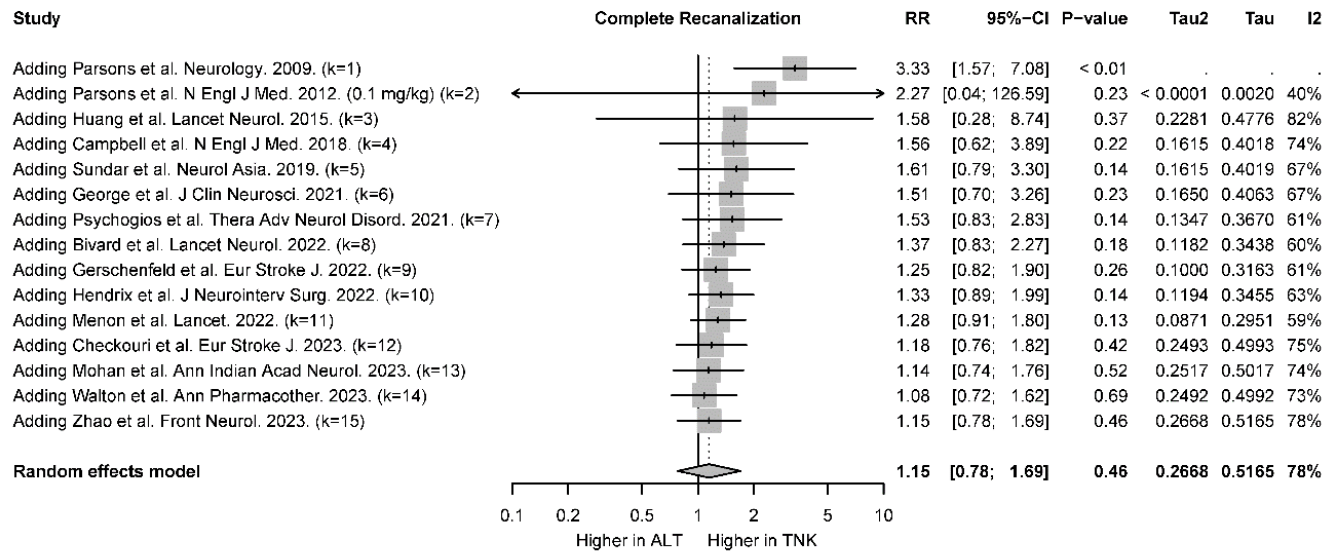

Mortality

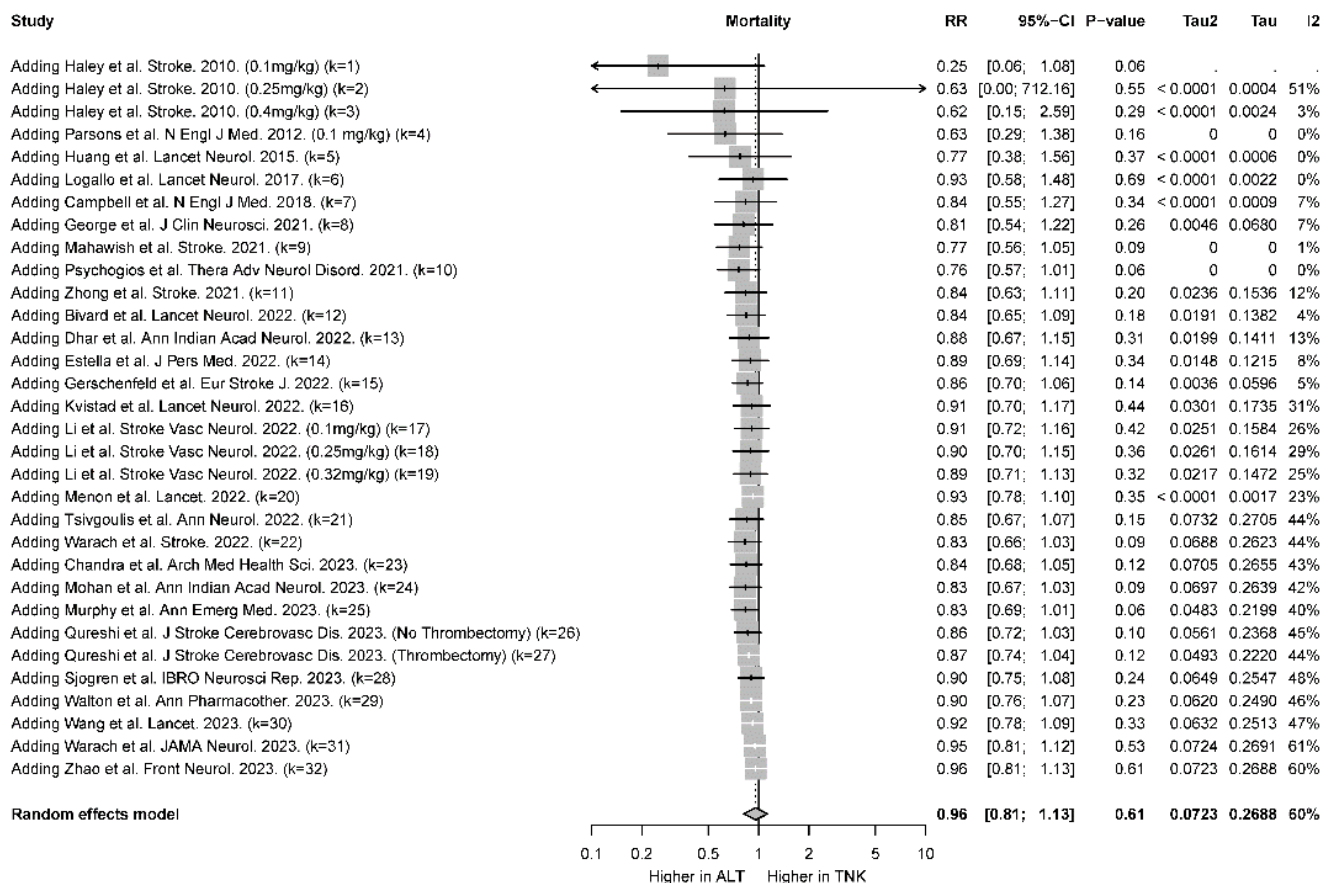

Supplementary Figure 8. Cumulative meta-analyses and leave-one-out influence analyses. RR, risk ratio; CI, confidence interval; TNK, tenecteplase; ALT, alteplase.

sICH

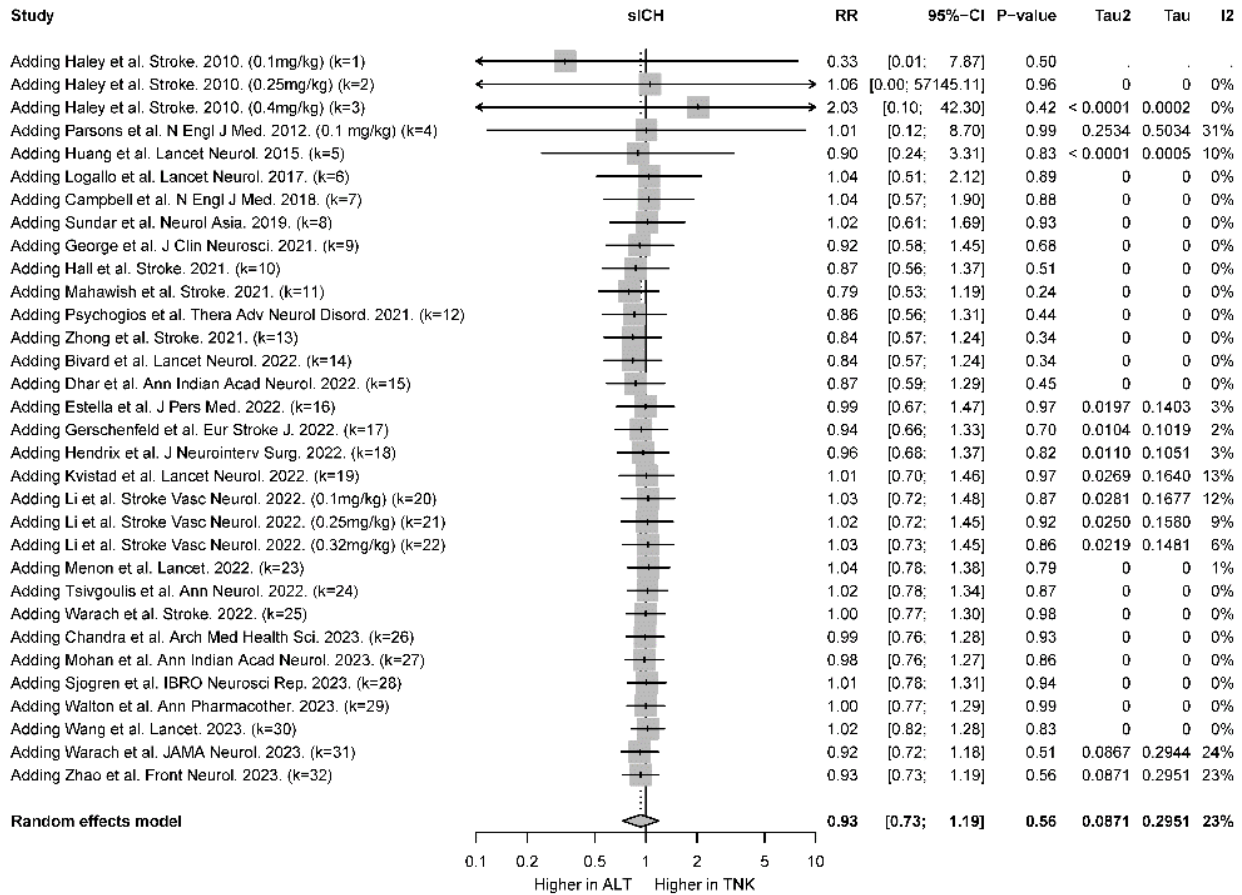

Any ICH

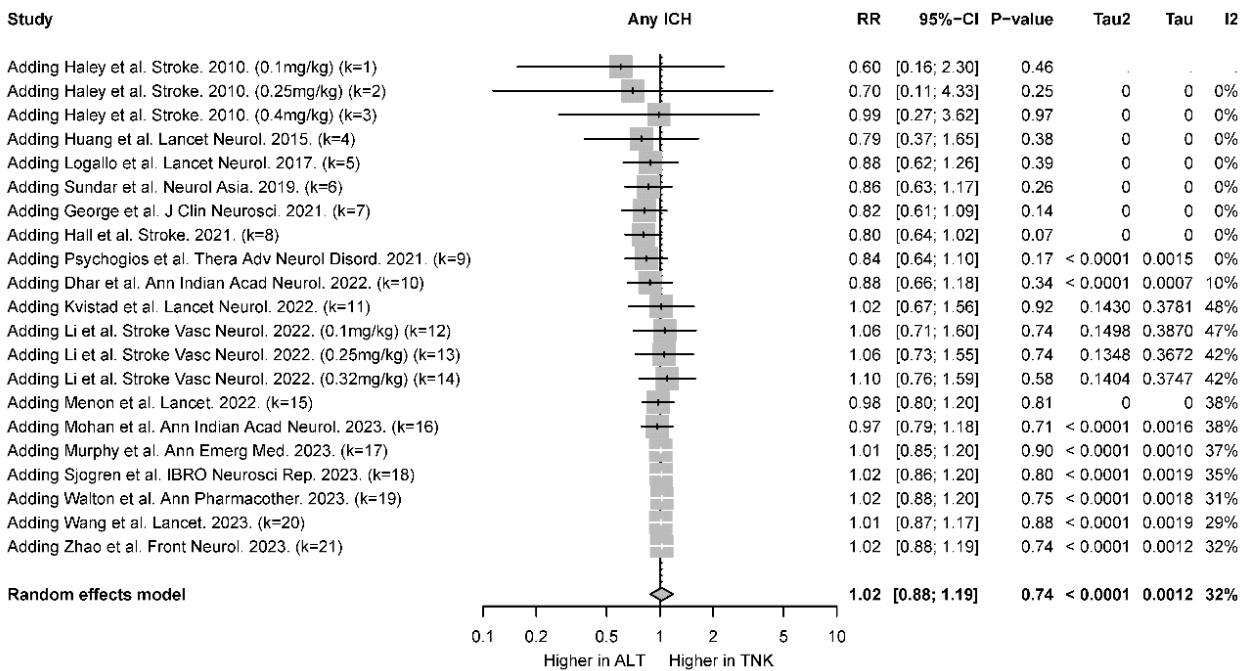

Supplementary Figure 8. Cumulative meta-analyses and leave-one-out influence analyses. sICH, symptomatic intracranial hemorrhage; ICH, intracranial hemorrhage; RR, risk ratio; CI, confidence interval; TNK, tenecteplase; ALT, alteplase.

Early neurological improvement

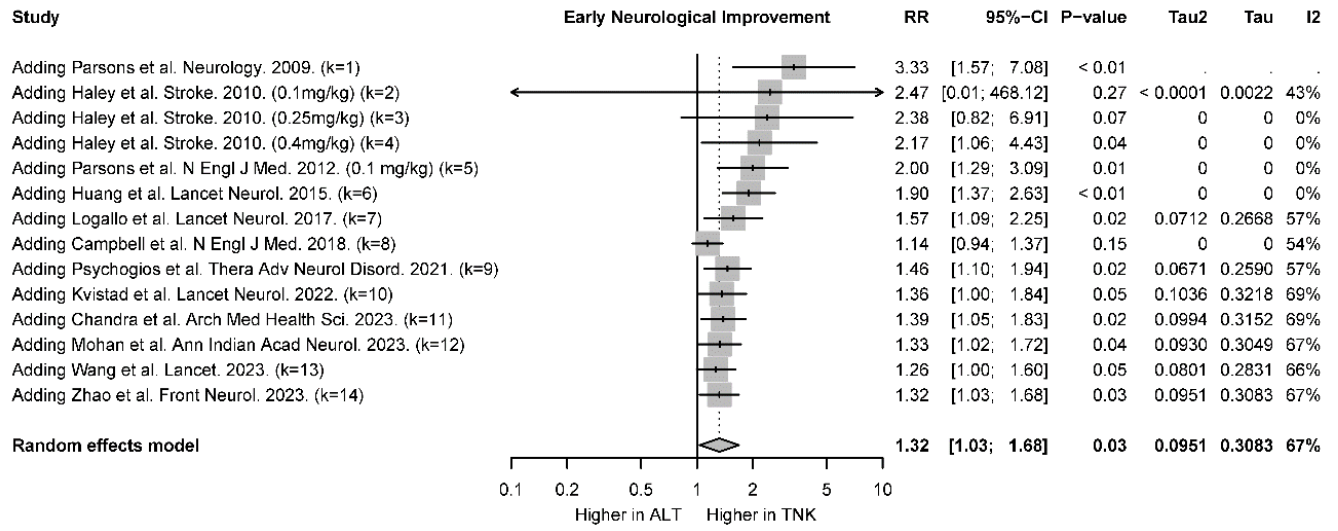

Parenchymal hemorrhage

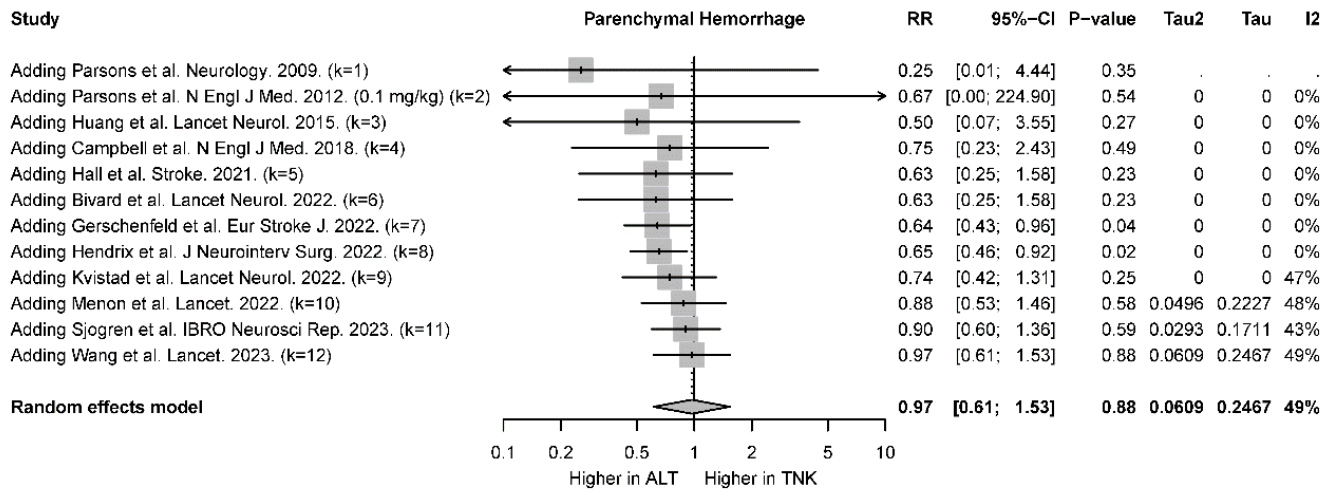

Supplementary Figure 8. Cumulative meta-analyses and leave-one-out influence analyses. RR, risk ratio; CI, confidence interval; TNK, tenecteplase; ALT, alteplase.

Leave-one-out analysis

mRS 0 to 2

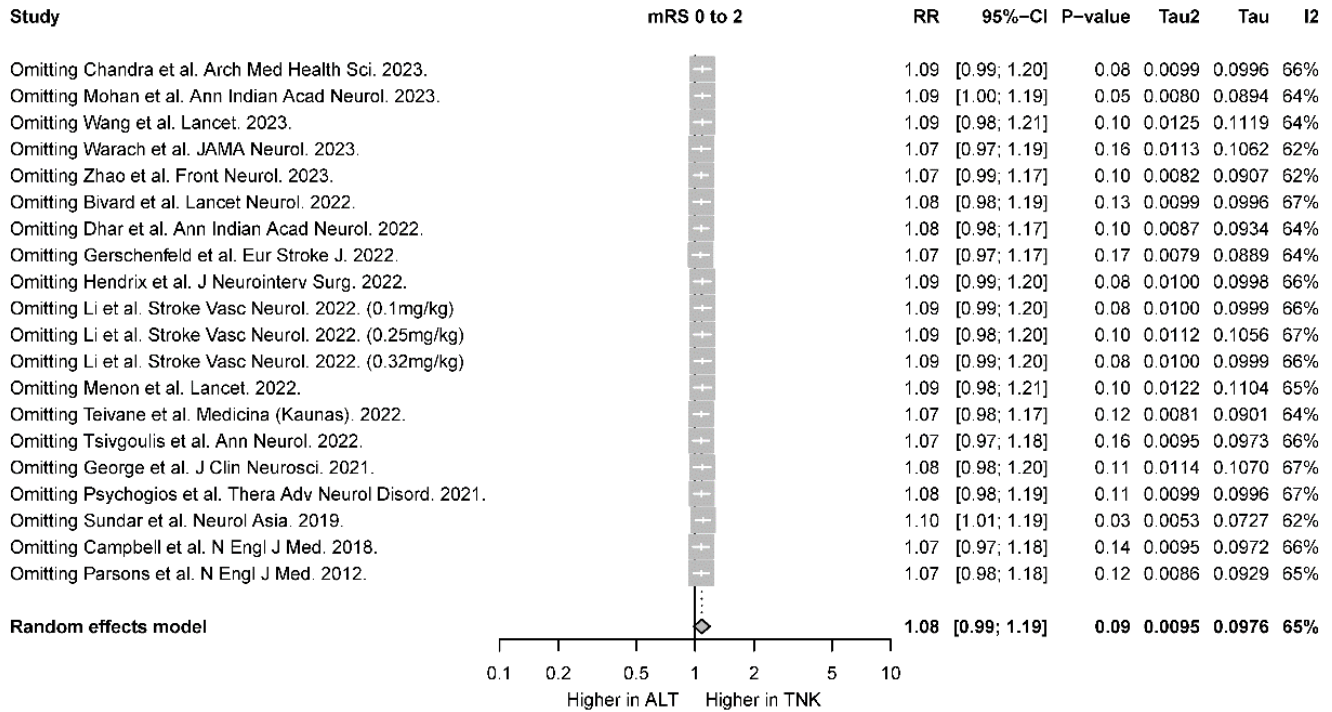

mRS 0 to 1

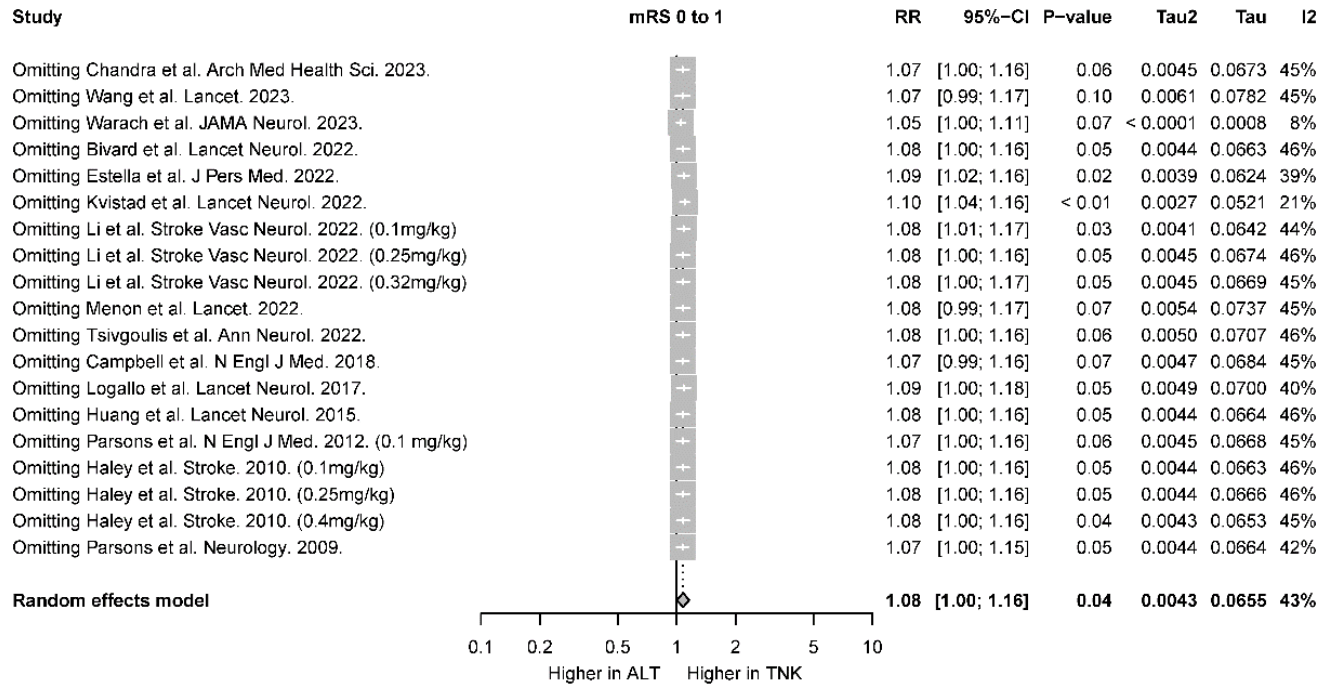

Supplementary Figure 8. Cumulative meta-analyses and leave-one-out influence analyses. mRS, modified Rankin Scale; RR, risk ratio; CI, confidence interval; TNK, tenecteplase; ALT, alteplase.



Complete recanalization

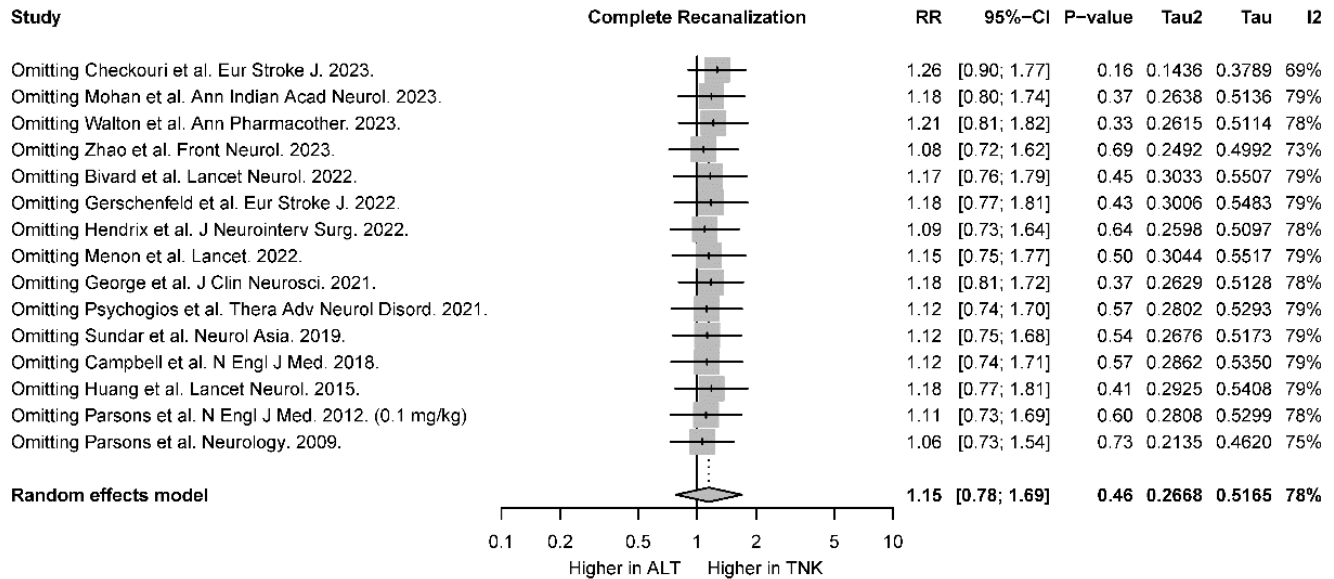

Mortality

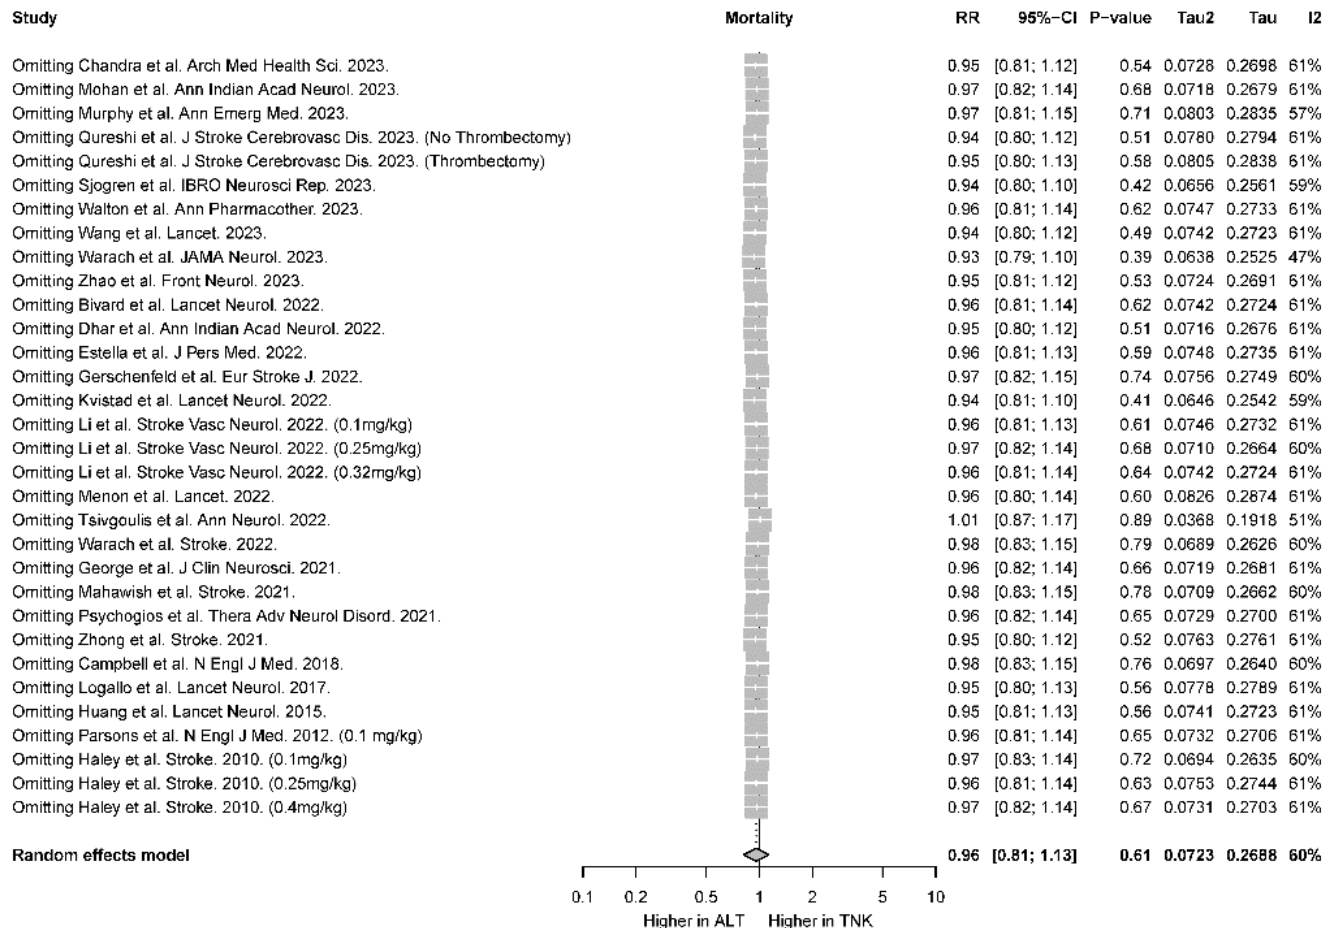

Supplementary Figure 8. Cumulative meta-analyses and leave-one-out influence analyses. RR, risk ratio; CI, confidence interval; TNK, tenecteplase; ALT, alteplase.

sICH

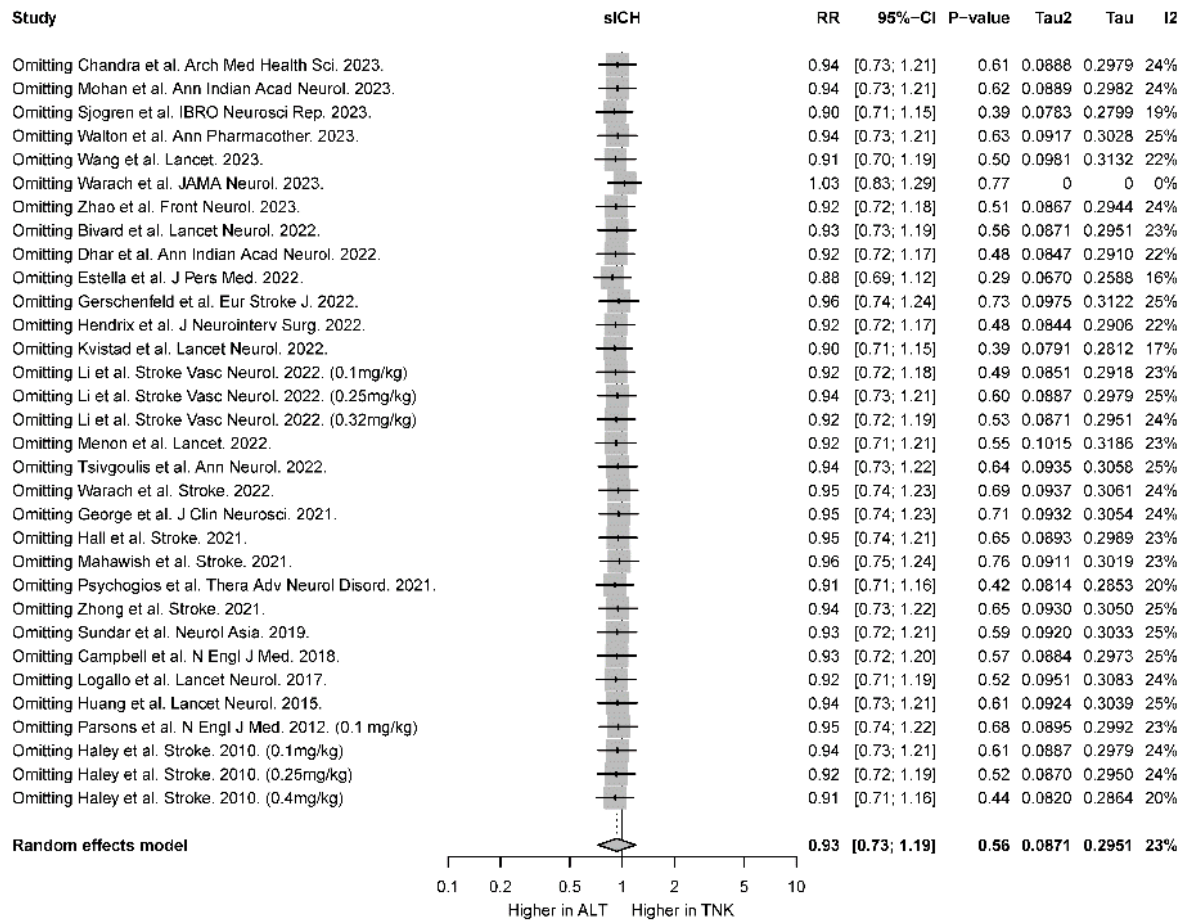

Any ICH

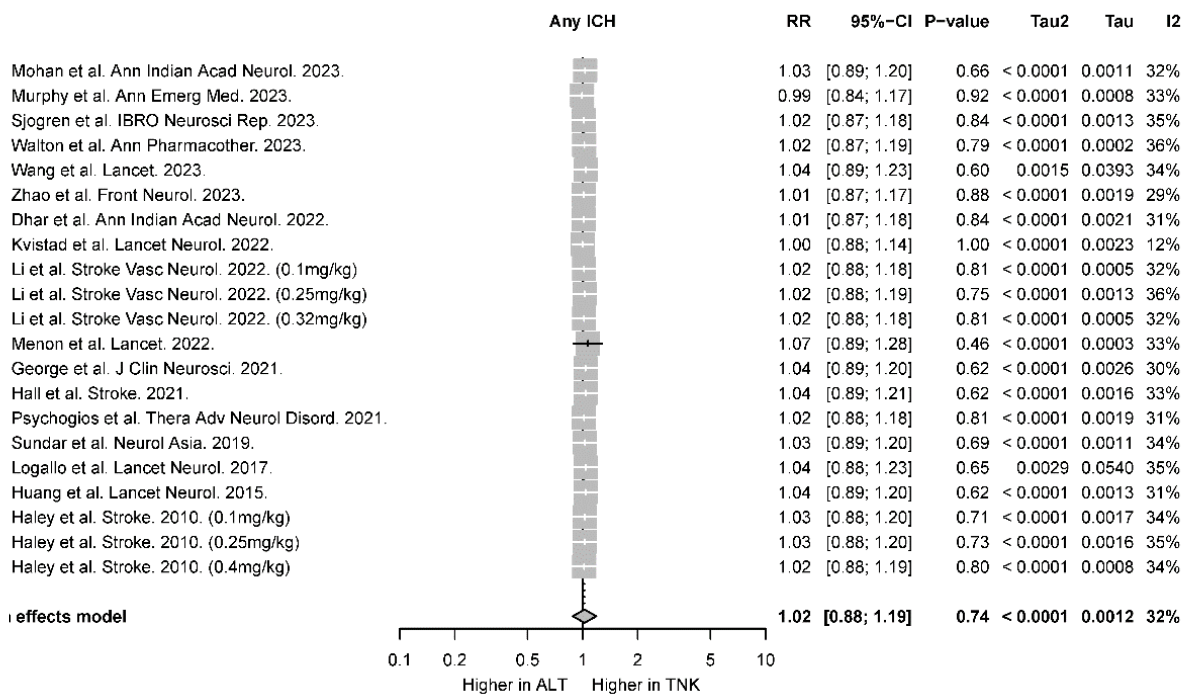

Supplementary Figure 8. Cumulative meta-analyses and leave-one-out influence analyses. sICH, symptomatic intracranial hemorrhage; ICH, intracranial hemorrhage; RR, risk ratio; CI, confidence interval; TNK, tenecteplase; ALT, alteplase.

Early neurological improvement

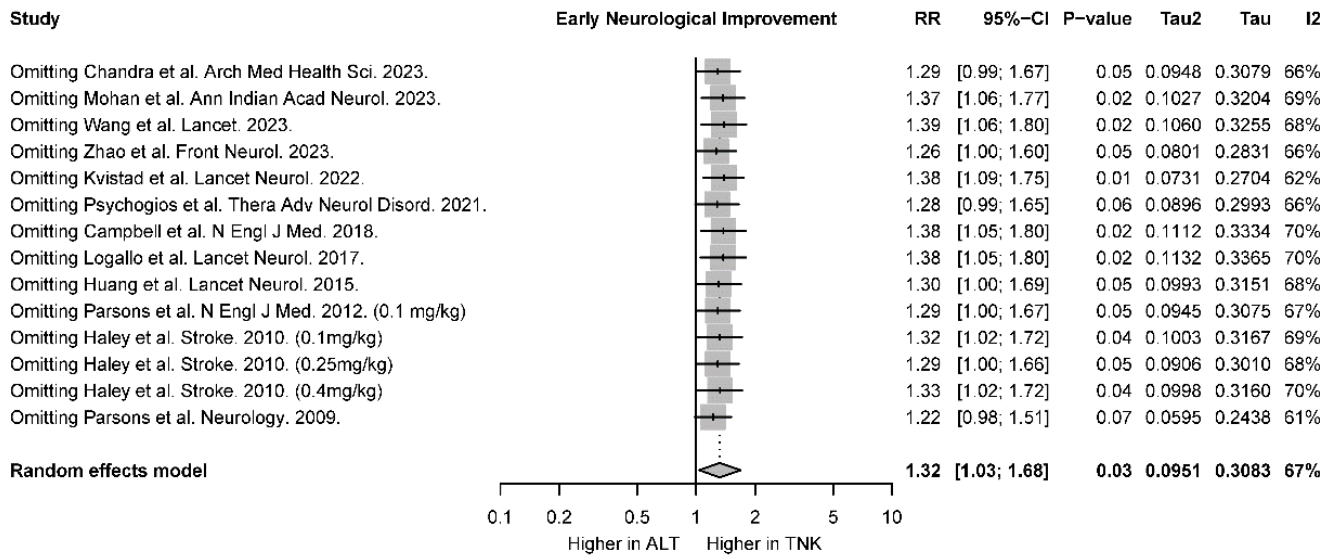

Parenchymal hemorrhage

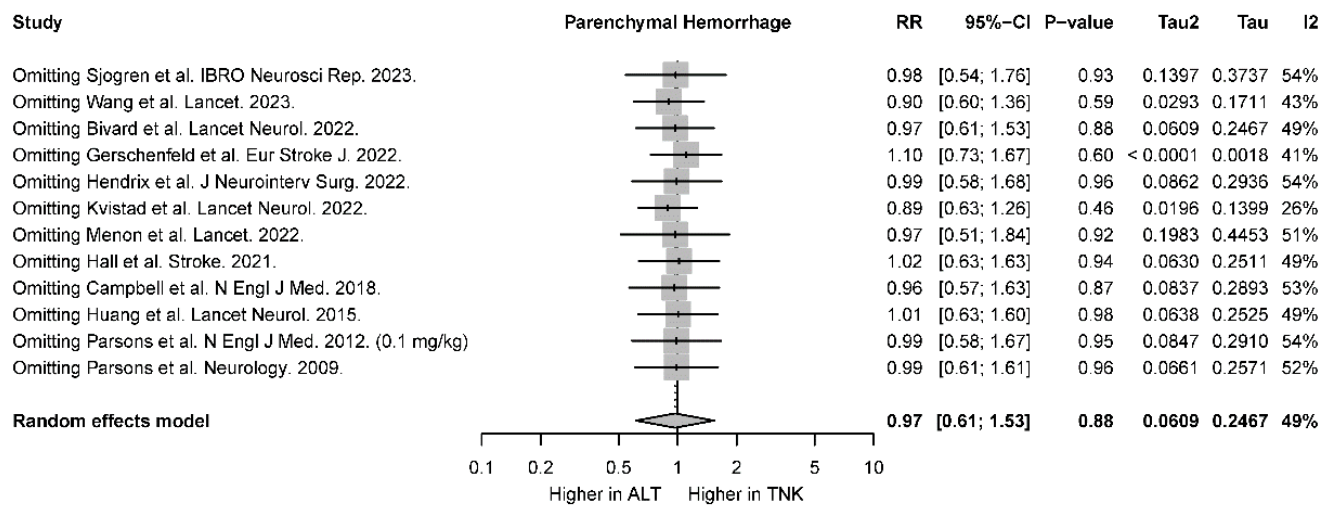

**Supplementary Figure 8.** Cumulative meta-analyses and leave-one-out influence analyses. RR, risk ratio; CI, confidence interval; TNK, tenecteplase; ALT, alteplase.
