# Supplementary material for: Ethnic Differences in the Safety and Efficacy of Tenecteplase Versus Alteplase for Acute Ischemic Stroke: A Systematic Review and Meta-Analysis
Source: PubMed Central journal article supplement — J Stroke. 2024 Sep 13;26(3):371–90. doi: 10.5853/jos.2024.01284 (PMC11471352; doi:10.5853/jos.2024.01284), 2024-09-13
Supplement: jos-2024-01284-Supplementary-Methods.pdf [file jos-2024-01284-Supplementary-Methods.pdf]

## Supplementary Methods

### Search strategy

#### *MEDLINE (268)*

1. exp tenecteplase/ or ('tenecteplase' or 'metalyse' or 'TNKase').tw.
2. exp ischemic stroke/ or ('ischemic stroke' or 'ischaemic stroke' or 'cryptogenic stroke' or 'wake-up stroke' or 'ICA occlusion' or 'MCA occlusion').tw.
3. exp ischemic attack, transient/ or ('transient ischemia' or 'transient ischaemia' or 'TIA').tw.
4. 2 or 3
5. 1 and 4

#### *Embase (804)*

1. exp tenecteplase/ or ('tenecteplase' or 'metalyse' or 'TNKase').tw.
2. exp ischemic stroke/ or ('ischemic stroke' or 'ischaemic stroke'

or 'cryptogenic stroke' or 'wake-up stroke' or 'ICA occlusion' or 'MCA occlusion').tw.

3. exp ischemic attack, transient/ or ('transient ischemia' or 'transient ischaemia' or 'TIA').tw.

4. 2 or 3

5. 1 and 4

#### *Cochrane (230)*

1. [mh tenecteplase] OR ('tenecteplase':ti,ab OR 'metalyse':ti,ab OR 'TNKase':ti,ab)

2. [mh "ischemic stroke"] OR ("ischemic stroke":ti,ab OR "ischaemic stroke":ti,ab OR "cryptogenic stroke":ti,ab OR "wake-up stroke":ti,ab OR "ICA occlusion":ti,ab OR "MCA occlusion":ti,ab)

3. [mh "ischemic attack, transient"] OR ("transient ischemia":ti,ab OR "transient ischaemia":ti,ab OR 'TIA':ti,ab)

4. #2 or #3

5. #1 and #4
