# Supplementary material for: Ethnic Differences in the Safety and Efficacy of Tenecteplase Versus Alteplase for Acute Ischemic Stroke: A Systematic Review and Meta-Analysis
Source: PubMed Central journal article supplement — J Stroke. 2024 Sep 13;26(3):371–90. doi: 10.5853/jos.2024.01284 (PMC11471352; doi:10.5853/jos.2024.01284), 2024-09-13
Supplement: jos-2024-01284-Supplementary-Table-1.pdf [file jos-2024-01284-Supplementary-Table-1.pdf]

**Supplementary Table 1.** Results of the meta-regression analysis

| Outcome                          | Coefficient | SE     | Z     | P     | 95% CI             | R <sup>2</sup> (%) | I <sup>2</sup> (%) |
|----------------------------------|-------------|--------|-------|-------|--------------------|--------------------|--------------------|
| <b>mRS 0 to 2</b>                |             |        |       |       |                    |                    |                    |
| Mean age (years)                 | 0.0155      | 0.0071 | 2.18  | 0.043 | 0.0009 to 0.0301   | 55.85              | 31.29              |
| Mean NIHSS score                 | 0.0135      | 0.0103 | 1.31  | 0.189 | -0.0006 to 0.0337  | 0.00               | 0.00               |
| Time from stroke onset (minutes) | 0.0004      | 0.0008 | 0.46  | 0.648 | -0.0013 to 0.0021  | 0.00               | 8.00               |
| Male gender (%)                  | -0.5482     | 0.2511 | -2.18 | 0.054 | -1.0664 to -0.0301 | 61.88              | 24.84              |
| DM (%)                           | -1.1221     | 0.4951 | -2.27 | 0.038 | -2.1716 to -0.0726 | 100.00             | 0.00               |
| HTN (%)                          | -0.1021     | 0.3784 | -0.27 | 0.749 | -0.9044 to 0.7001  | 6.10               | 54.35              |
| HLD (%)                          | 0.8591      | 0.4562 | 1.88  | 0.058 | -0.2198 to 1.9379  | 0.00               | 0.02               |
| LVO (%)                          | 0.7002      | 0.3611 | 1.94  | 0.053 | -0.0077 to 1.4081  | 99.98              | 0.00               |
| Antiplatelet (%)                 | 0.4621      | 0.2704 | 1.71  | 0.087 | -0.0679 to 0.9922  | 99.98              | 0.00               |
| Anticoagulant (%)                | -1.1165     | 0.7044 | -1.58 | 0.113 | -2.4973 to 0.2641  | 99.97              | 0.00               |
| <b>mRS 0 to 1</b>                |             |        |       |       |                    |                    |                    |
| Mean age (years)                 | 0.0067      | 0.0102 | 0.65  | 0.574 | -0.0145 to 0.0278  | 7.49               | 19.41              |
| Mean NIHSS score                 | 0.0040      | 0.0089 | 0.45  | 0.650 | -0.0135 to 0.0216  | 62.68              | 0.00               |
| Time from stroke onset (minutes) | 0.0028      | 0.0016 | 1.70  | 0.089 | -0.0043 to 0.0061  | 0.00               | 46.07              |
| Male gender (%)                  | -0.4380     | 0.1441 | -3.04 | 0.070 | -0.7360 to -0.1400 | 100.00             | 0.00               |
| DM (%)                           | 0.2913      | 0.4328 | 0.67  | 0.466 | -0.6219 to 1.2045  | 54.74              | 0.00               |
| HTN (%)                          | -0.0053     | 0.1693 | -0.03 | 0.973 | -0.3625 to 0.3518  | 0.00               | 0.02               |
| HLD (%)                          | -0.2444     | 0.3236 | -0.76 | 0.453 | -0.9434 to 0.4546  | 29.36              | 0.01               |
| LVO (%)                          | -1.6247     | 1.6767 | -0.97 | 0.333 | -4.9110 to 1.6616  | 0.00               | 47.87              |
| Antiplatelet (%)                 | 0.0011      | 0.3619 | 0.03  | 0.974 | -0.6974 to 0.7213  | 0.00               | 0.00               |
| Anticoagulant (%)                | 0.5236      | 1.0640 | 0.49  | 0.623 | -1.5617 to 2.6091  | 2.62               | 0.00               |
| <b>Complete recanalization</b>   |             |        |       |       |                    |                    |                    |
| Mean age (years)                 | 0.0618      | 0.0249 | 2.48  | 0.014 | 0.0089 to 0.1146   | 42.27              | 65.04              |
| Mean NIHSS score                 | 0.0885      | 0.0489 | 1.81  | 0.070 | -0.0073 to 0.1844  | 8.62               | 80.89              |
| Time from stroke onset (minutes) | -0.0037     | 0.0048 | -0.79 | 0.432 | -0.0132 to 0.0056  | 0.00               | 82.47              |
| Male gender (%)                  | -1.7773     | 1.3069 | -1.36 | 0.175 | -4.5477 to 0.9931  | 28.09              | 70.89              |
| DM (%)                           | -2.7522     | 2.6086 | -1.06 | 0.297 | -8.5645 to 3.0601  | 34.54              | 63.11              |
| HTN (%)                          | -0.1445     | 1.1485 | -0.13 | 0.889 | -2.6724 to 2.3834  | 2.03               | 71.98              |
| HLD (%)                          | 0.2783      | 1.3743 | 0.20  | 0.852 | -3.5375 to 4.0941  | 64.70              | 0.00               |
| LVO (%)                          | -0.4404     | 1.7899 | -0.25 | 0.806 | -3.9487 to 3.0678  | 0.00               | 51.74              |
| Antiplatelet (%)                 | 6.3361      | 3.030  | 2.09  | 0.037 | 0.3963 to 12.276   | 100.00             | 0.00               |
| Anticoagulant (%)                | -7.1152     | 4.6462 | -1.53 | 0.126 | -16.2217 to 1.9913 | 51.73              | 57.06              |
| <b>Mortality</b>                 |             |        |       |       |                    |                    |                    |
| Mean age (years)                 | 0.0199      | 0.0175 | 1.13  | 0.259 | -0.0157 to 0.0554  | 0.00               | 52.56              |
| Mean NIHSS score                 | 0.0030      | 0.0351 | 0.09  | 0.932 | -0.0659 to 0.0719  | 0.00               | 50.94              |
| Time from stroke onset (minutes) | -0.0017     | 0.0024 | -0.72 | 0.472 | -0.0065 to 0.0030  | 0.00               | 64.68              |
| Male gender (%)                  | -0.3390     | 0.7684 | -0.44 | 0.657 | -1.8974 to 1.2194  | 5.13               | 48.71              |
| DM (%)                           | -0.1292     | 1.0489 | -0.12 | 0.914 | -2.2815 to 2.0230  | 0.00               | 45.29              |
| HTN (%)                          | -0.2962     | 0.3762 | -0.79 | 0.451 | -1.0680 to 0.4756  | 5.35               | 44.11              |
| HLD (%)                          | -0.1516     | 0.3473 | -0.44 | 0.495 | -0.8878 to 0.5846  | 0.00               | 0.00               |
| LVO (%)                          | 1.0986      | 1.2837 | 0.86  | 0.392 | -1.4174 to 3.6147  | 0.00               | 51.20              |
| Antiplatelet (%)                 | -0.7968     | 1.3548 | -0.59 | 0.556 | -3.4523 to 1.8587  | 0.00               | 50.77              |
| Anticoagulant (%)                | -0.5830     | 1.6574 | -0.35 | 0.725 | -3.8315 to 2.6654  | 0.00               | 57.25              |

Supplementary Table 1. Continued

| Outcome                          | Coefficient | SE     | Z     | P     | 95% CI             | R <sup>2</sup> (%) | I <sup>2</sup> (%) |
|----------------------------------|-------------|--------|-------|-------|--------------------|--------------------|--------------------|
| sICH                             |             |        |       |       |                    |                    |                    |
| Mean age (years)                 | 0.0232      | 0.0279 | 0.83  | 0.508 | -0.0332 to 0.0796  | 0.00               | 19.83              |
| Mean NIHSS score                 | 0.0527      | 0.0401 | 1.31  | 0.189 | -0.0259 to 0.1315  | 73.41              | 0.00               |
| Time from stroke onset (minutes) | -0.0013     | 0.0037 | -0.37 | 0.714 | -0.0086 to 0.0059  | 0.00               | 22.29              |
| Male gender (%)                  | 2.1311      | 0.6776 | 3.15  | 0.054 | 0.7581 to 3.5041   | 100.00             | 0.00               |
| DM (%)                           | -1.5507     | 1.4407 | -1.08 | 0.272 | -4.5067 to 1.4053  | 0.00               | 0.00               |
| HTN (%)                          | -0.6575     | 0.7233 | -0.91 | 0.373 | -2.1416 to 0.8265  | 0.00               | 0.00               |
| HLD (%)                          | 0.6679      | 1.1402 | 0.59  | 0.450 | -1.7776 to 3.1134  | 0.00               | 0.00               |
| LVO (%)                          | -1.6335     | 1.6038 | -1.02 | 0.308 | -4.7700 to 1.5098  | 68.54              | 0.00               |
| Antiplatelet (%)                 | -1.4394     | 1.3573 | -1.06 | 0.289 | -4.0998 to 1.2209  | 0.00               | 0.00               |
| Anticoagulant (%)                | -1.4227     | 2.1581 | -0.66 | 0.510 | -5.6526 to 2.8071  | 0.00               | 2.16               |
| Early neurological improvement   |             |        |       |       |                    |                    |                    |
| Mean age (years)                 | 0.0331      | 0.0178 | 1.87  | 0.086 | -0.0045 to 0.0708  | 21.51              | 69.04              |
| Mean NIHSS score                 | 0.0445      | 0.0307 | 1.45  | 0.147 | -0.0157 to 0.1048  | 0.00               | 80.91              |
| Time from stroke onset (minutes) | 0.0068      | 0.0039 | 0.17  | 0.862 | -0.0069 to 0.0083  | 0.00               | 85.91              |
| Male gender (%)                  | -1.2536     | 0.9532 | -1.32 | 0.198 | -3.2743 to 0.7670  | 18.00              | 68.78              |
| DM (%)                           | -1.2476     | 1.2386 | -1.01 | 0.349 | -3.9463 to 1.4511  | 2.21               | 53.08              |
| HTN (%)                          | -0.0146     | 0.5206 | -0.03 | 0.968 | -1.1489 to 1.1196  | 0.53               | 54.89              |
| HLD (%)                          | 0.2136      | 0.6507 | 0.33  | 0.730 | -1.2363 to 1.6634  | 0.00               | 70.59              |
| LVO (%)                          | -2.3089     | 1.0609 | -2.18 | 0.030 | -4.3883 to -0.2294 | 100.00             | 0.00               |
| Antiplatelet (%)                 | 1.2298      | 1.2864 | 0.96  | 0.339 | -1.2916 to 3.7513  | 0.00               | 54.37              |
| Anticoagulant (%)                | -2.038      | 2.0431 | -1.00 | 0.318 | -6.0432 to 1.9655  | 0.00               | 68.70              |
| Any ICH                          |             |        |       |       |                    |                    |                    |
| Mean age (years)                 | -0.0008     | 0.0140 | -0.05 | 0.950 | -0.0297 to 0.0282  | 64.44              | 0.00               |
| Mean NIHSS score                 | 0.0713      | 0.0384 | 1.86  | 0.064 | -0.0040 to 0.1467  | 0.00               | 30.75              |
| Time from stroke onset (minutes) | -0.0010     | 0.0020 | -0.52 | 0.607 | -0.0051 to 0.0029  | 0.00               | 40.81              |
| Male gender (%)                  | -0.0402     | 0.7971 | -0.05 | 0.951 | -1.6818 to 1.6015  | 60.52              | 0.00               |
| DM (%)                           | -1.2208     | 1.0867 | -1.12 | 0.326 | -3.4876 to 1.0460  | 0.00               | 23.26              |
| HTN (%)                          | -0.4495     | 0.3904 | -1.15 | 0.287 | -1.2613 to 0.3624  | 99.98              | 0.00               |
| HLD (%)                          | 0.6322      | 0.9528 | 0.66  | 0.553 | -1.4649 to 2.7293  | 100.00             | 0.00               |
| LVO (%)                          | -0.5549     | 1.0054 | -0.06 | 0.956 | -2.0261 to 1.9150  | 0.00               | 37.31              |
| Antiplatelet (%)                 | 1.5337      | 2.9369 | 0.52  | 0.605 | -4.2751 to 7.3423  | 0.00               | 34.67              |
| Anticoagulant (%)                | -4.9476     | 2.6007 | -1.90 | 0.057 | -10.045 to 0.1497  | 73.83              | 11.53              |

SE, standard error; CI, confidence interval; mRS, modified Rankin Scale; NIHSS, National Institutes of Health Stroke Scale; DM, diabetes mellitus; HTN, hypertension; HLD, hyperlipidemia; LVO, large vessel occlusion; sICH, symptomatic intracranial hemorrhage; ICH, intracranial hemorrhage; NA, not applicable.
