# Supplementary material for: Ethnic Differences in the Safety and Efficacy of Tenecteplase Versus Alteplase for Acute Ischemic Stroke: A Systematic Review and Meta-Analysis
Source: PubMed Central journal article supplement — J Stroke. 2024 Sep 13;26(3):371–90. doi: 10.5853/jos.2024.01284 (PMC11471352; doi:10.5853/jos.2024.01284), 2024-09-13
Supplement: jos-2024-01284-Supplementary-Table-2.pdf [file jos-2024-01284-Supplementary-Table-2.pdf]

**Supplementary Table 2.** Evaluation of quality of pooled evidence using the GRADE framework

| Outcomes                       | Effect size (95% CI) | Number of patients (number of included studies) | I <sup>2</sup> | A  | B | C  | D | E | F | G | H | Quality of evidence |
|--------------------------------|----------------------|-------------------------------------------------|----------------|----|---|----|---|---|---|---|---|---------------------|
| mRS 0 to 2                     | 1.09 (1.05–1.12)     | 15,962 (18)                                     | 65             |    |   |    |   |   |   |   |   | Moderate            |
| mRS 0 to 1                     | 1.11 (1.06–1.15)     | 15,880 (15)                                     | 43             |    |   |    |   |   |   |   |   | Moderate            |
| Complete recanalization        | 1.07 (0.94–1.21)     | 5,416 (14)                                      | 78             |    |   | -1 |   |   |   |   |   | Low                 |
| Mortality                      | 1.02 (0.94–1.09)     | 57,218 (27)                                     | 60             |    |   |    |   |   |   |   |   | Moderate            |
| sICH                           | 0.84 (0.70–1.02)     | 20,092 (28)                                     | 23             |    |   |    |   |   |   |   |   | Moderate            |
| Early neurological improvement | 1.05 (0.98–1.12)     | 3,673 (12)                                      | 67             |    |   | -1 |   |   |   |   |   | Low                 |
| Any ICH                        | 1.02 (0.91–1.15)     | 13,245 (17)                                     | 32             | -1 |   |    |   |   |   |   |   | Low                 |
| Parenchymal hemorrhage         | 0.97 (0.61–1.53)     | 5,125 (12)                                      | 49             | -1 |   |    |   |   |   |   |   | Low                 |

GRADE, Grading of Recommendations Assessment, Development and Evaluation; CI, confidence interval; A, risk of bias among included studies; B, imprecision; C, inconsistency; D, indirectness of evidence; E, publication bias; F, dose response gradient; G, large effect size; H, biases increasing confidence in the estimate; mRS, modified Rankin Scale; sICH, symptomatic intracranial hemorrhage; ICH, intracranial hemorrhage.
